# Supplementary material
Source: MDPI journal article supplement (https://www.mdpi.com/1996-1073/16/19/6989)
Supplement: s1 [file s1]

## Supplementary I Simulation data and range analysis table

### (Physical parameters /F2→F3)

Table S1 Output shaft speed drop simulation data and range analysis table (Physical parameters /F2→F3)

|                        | factor                                                      | A        | B               | C       | D       | minimum speed     | time (s) | speed drop |
|------------------------|-------------------------------------------------------------|----------|-----------------|---------|---------|-------------------|----------|------------|
|                        | column number                                               | 1        | 2               | 3       | 4       | (r/min)           |          |            |
| scheme                 | 1                                                           | 1 (1200) | 1 (120)         | 1 (30)  | 1 (3)   | 289.24            | 20.70    | 1425.05    |
|                        | 2                                                           | 1        | 2 (160)         | 2 (40)  | 2 (4)   | 285.34            | 20.57    | 1428.95    |
|                        | 3                                                           | 1        | 3 (200)         | 3 (50)  | 3 (5)   | 285.64            | 20.56    | 1428.65    |
|                        | 4                                                           | 2 (1600) | 1               | 2       | 3       | 411.44            | 20.57    | 1874.27    |
|                        | 5                                                           | 2        | 2               | 3       | 1       | 411.46            | 20.73    | 1874.25    |
|                        | 6                                                           | 2        | 3               | 1       | 2       | 414.62            | 20.63    | 1871.09    |
|                        | 7                                                           | 3 (2000) | 1               | 3       | 2       | 538.41            | 20.65    | 2318.73    |
|                        | 8                                                           | 3        | 2               | 1       | 3       | 546.25            | 20.57    | 2310.89    |
|                        | 9                                                           | 3        | 3               | 2       | 1       | 545.81            | 20.73    | 2311.33    |
| mean                   | $\bar{K}_{1j}$                                              | 1427.55  | 1872.68         | 1869.01 | 1870.21 | $\bar{K}=1871.47$ |          |            |
|                        | $\bar{K}_{2j}$                                              | 1873.20  | 1871.36         | 1871.52 | 1872.92 |                   |          |            |
|                        | $\bar{K}_{3j}$                                              | 2313.65  | 1870.36         | 1873.88 | 1871.27 |                   |          |            |
| Range                  | $\bar{R}_j$                                                 | 886.10   | 2.32            | 4.87    | 2.71    |                   |          |            |
| optimization<br>scheme | A <sub>1</sub> C <sub>1</sub> D <sub>1</sub> B <sub>3</sub> |          | feasible scheme |         |         | A <sub>1</sub>    |          |            |

Note: When the input speed is 1200/1600/2000(r/min), the stable rotating speed of mechanical gear is 1714.29/2285.71/2857.14(r/min).

Table S2 Output shaft acceleration torque ratio simulation data and range analysis table (Physical parameters /F2→F3)

|                        | factor                                                      | A        | B               | C      | D     | acceleration torque | time  | dynamic load |
|------------------------|-------------------------------------------------------------|----------|-----------------|--------|-------|---------------------|-------|--------------|
|                        | column number                                               | 1        | 2               | 3      | 4     | (Nm)                | (s)   | coefficient  |
| scheme                 | 1                                                           | 1 (1200) | 1 (120)         | 1 (30) | 1 (3) | 307.55              | 22.05 | 2.56         |
|                        | 2                                                           | 1        | 2 (160)         | 2 (40) | 2 (4) | 329.18              | 21.82 | 2.06         |
|                        | 3                                                           | 1        | 3 (200)         | 3 (50) | 3 (5) | 350.00              | 21.67 | 1.75         |
|                        | 4                                                           | 2 (1600) | 1               | 2      | 3     | 331.24              | 22.12 | 2.76         |
|                        | 5                                                           | 2        | 2               | 3      | 1     | 354.92              | 22.39 | 2.22         |
|                        | 6                                                           | 2        | 3               | 1      | 2     | 308.24              | 22.27 | 1.54         |
|                        | 7                                                           | 3 (2000) | 1               | 3      | 2     | 355.32              | 22.59 | 2.96         |
|                        | 8                                                           | 3        | 2               | 1      | 3     | 308.56              | 22.68 | 1.93         |
|                        | 9                                                           | 3        | 3               | 2      | 1     | 331.98              | 22.83 | 1.66         |
| mean                   | $\bar{K}_{1j}$                                              | 2.12     | 2.76            | 2.01   | 2.15  | $\bar{K}=2.16$      |       |              |
|                        | $\bar{K}_{2j}$                                              | 2.17     | 2.07            | 2.16   | 2.19  |                     |       |              |
|                        | $\bar{K}_{3j}$                                              | 2.18     | 1.65            | 2.31   | 2.15  |                     |       |              |
| range                  | $\bar{R}_j$                                                 | 0.06     | 1.11            | 0.30   | 0.04  |                     |       |              |
| optimization<br>scheme | B <sub>3</sub> C <sub>1</sub> A <sub>1</sub> D <sub>1</sub> |          | feasible scheme |        |       | B <sub>3</sub>      |       |              |

Table S3 Output shaft maximum impact simulation data and range analysis table (Physical parameters /F2→F3)

|                     | factor                                                      | A        | B               | C      | D                             | maximum impact | time (s) |
|---------------------|-------------------------------------------------------------|----------|-----------------|--------|-------------------------------|----------------|----------|
|                     | column number                                               | 1        | 2               | 3      | 4                             |                |          |
| scheme              | 1                                                           | 1 (1200) | 1 (120)         | 1 (30) | 1 (3)                         | 9.15           | 22.74    |
|                     | 2                                                           | 1        | 2 (160)         | 2 (40) | 2 (4)                         | 7.51           | 22.51    |
|                     | 3                                                           | 1        | 3 (200)         | 3 (50) | 3 (5)                         | 10.60          | 22.34    |
|                     | 4                                                           | 2 (1600) | 1               | 2      | 3                             | 8.12           | 22.93    |
|                     | 5                                                           | 2        | 2               | 3      | 1                             | 8.62           | 23.09    |
|                     | 6                                                           | 2        | 3               | 1      | 2                             | 8.21           | 23.15    |
|                     | 7                                                           | 3 (2000) | 1               | 3      | 2                             | 8.13           | 23.37    |
|                     | 8                                                           | 3        | 2               | 1      | 3                             | 8.91           | 23.58    |
|                     | 9                                                           | 3        | 3               | 2      | 1                             | 7.58           | 23.68    |
| mean                | $\bar{K}_{1j}$                                              | 9.09     | 8.47            | 8.76   | 8.45                          | $\bar{K}=8.54$ |          |
|                     | $\bar{K}_{2j}$                                              | 8.32     | 8.35            | 7.74   | 7.95                          |                |          |
|                     | $\bar{K}_{3j}$                                              | 8.21     | 8.80            | 9.12   | 9.21                          |                |          |
| range               | $\bar{R}_j$                                                 | 0.88     | 0.45            | 1.38   | 1.26                          |                |          |
| optimization scheme | C <sub>2</sub> D <sub>2</sub> A <sub>3</sub> B <sub>2</sub> |          | feasible scheme |        | C <sub>2</sub> D <sub>2</sub> |                |          |

Table S4 Shift time simulation data and range analysis table (Physical parameters /F2→F3)

|                     | factor                                                      | A        | B               | C      | D                                            | timing of gear shift (s) | time (s) |
|---------------------|-------------------------------------------------------------|----------|-----------------|--------|----------------------------------------------|--------------------------|----------|
|                     | column number                                               | 1        | 2               | 3      | 4                                            |                          |          |
| scheme              | 1                                                           | 1 (1200) | 1 (120)         | 1 (30) | 1 (3)                                        | 2.69                     | 22.69    |
|                     | 2                                                           | 1        | 2 (160)         | 2 (40) | 2 (4)                                        | 2.47                     | 22.47    |
|                     | 3                                                           | 1        | 3 (200)         | 3 (50) | 3 (5)                                        | 2.30                     | 22.30    |
|                     | 4                                                           | 2 (1600) | 1               | 2      | 3                                            | 2.87                     | 22.87    |
|                     | 5                                                           | 2        | 2               | 3      | 1                                            | 3.04                     | 23.04    |
|                     | 6                                                           | 2        | 3               | 1      | 2                                            | 3.09                     | 23.09    |
|                     | 7                                                           | 3 (2000) | 1               | 3      | 2                                            | 3.32                     | 23.32    |
|                     | 8                                                           | 3        | 2               | 1      | 3                                            | 3.52                     | 23.52    |
|                     | 9                                                           | 3        | 3               | 2      | 1                                            | 3.62                     | 23.62    |
| mean                | $\bar{K}_{1j}$                                              | 2.49     | 2.96            | 3.10   | 3.12                                         | $\bar{K}=2.99$           |          |
|                     | $\bar{K}_{2j}$                                              | 3.00     | 3.01            | 2.99   | 2.96                                         |                          |          |
|                     | $\bar{K}_{3j}$                                              | 3.49     | 3.00            | 2.89   | 2.90                                         |                          |          |
| range               | $\bar{R}_j$                                                 | 1.00     | 0.05            | 0.21   | 0.22                                         |                          |          |
| optimization scheme | A <sub>1</sub> D <sub>3</sub> C <sub>3</sub> B <sub>1</sub> |          | feasible scheme |        | A <sub>1</sub> D <sub>3</sub> C <sub>3</sub> |                          |          |

## Supplementary II Simulation data and range analysis table (Gear shift timing /F1→F2)

Table S5 Output shaft speed drop simulation data and range analysis table (Gear shift timing /F1→F2)

|                     | factor                                                      | A        | B               | C        | D        | minimum speed                 | time  | speed  |
|---------------------|-------------------------------------------------------------|----------|-----------------|----------|----------|-------------------------------|-------|--------|
|                     | column number                                               | 1        | 2               | 3        | 4        | (r/min)                       | (s)   | drop   |
| scheme              | 1                                                           | 1 (9.5)  | 1 (9.5)         | 1 (9.5)  | 1 (9.5)  | 121.14                        | 10.65 | 335.46 |
|                     | 2                                                           | 1        | 2 (10.0)        | 2 (10.0) | 2 (10.0) | 149.42                        | 11.12 | 307.18 |
|                     | 3                                                           | 1        | 3 (10.5)        | 3 (10.5) | 3 (10.5) | 149.51                        | 11.62 | 307.09 |
|                     | 4                                                           | 2 (10.0) | 1               | 2        | 3        | 73.94                         | 11.04 | 382.66 |
|                     | 5                                                           | 2        | 2               | 3        | 1        | 245.30                        | 11.37 | 211.30 |
|                     | 6                                                           | 2        | 3               | 1        | 2        | 54.00                         | 11.11 | 402.60 |
|                     | 7                                                           | 3 (10.5) | 1               | 3        | 2        | 143.05                        | 11.36 | 313.55 |
|                     | 8                                                           | 3        | 2               | 1        | 3        | 72.22                         | 10.89 | 384.38 |
|                     | 9                                                           | 3        | 3               | 2        | 1        | 68.81                         | 11.30 | 387.79 |
| mean                | $\bar{K}_{1j}$                                              | 316.58   | 343.89          | 374.15   | 311.52   | $\bar{K}=336.89$              |       |        |
|                     | $\bar{K}_{2j}$                                              | 332.19   | 300.95          | 359.21   | 341.11   |                               |       |        |
|                     | $\bar{K}_{3j}$                                              | 361.91   | 365.83          | 277.31   | 358.04   |                               |       |        |
| range               | $\bar{R}_j$                                                 | 45.33    | 64.88           | 96.84    | 46.52    |                               |       |        |
| optimization scheme | C <sub>3</sub> B <sub>2</sub> D <sub>1</sub> A <sub>1</sub> |          | feasible scheme |          |          | C <sub>3</sub> B <sub>2</sub> |       |        |

Note: When the input speed is 1600(r/min), The stable rotating speed of hydraulic mechanical gear is 456.60(r/min)

Table S6 Output shaft acceleration torque ratio simulation data and range analysis table (Gear shift timing /F1→F2)

|              | factor                                                      | A        | B               | C        | D        | acceleration torque                          | time  | dynamic load |
|--------------|-------------------------------------------------------------|----------|-----------------|----------|----------|----------------------------------------------|-------|--------------|
|              | column number                                               | 1        | 2               | 3        | 4        | (Nm)                                         | (s)   | coefficient  |
| scheme       | 1                                                           | 1 (9.5)  | 1 (9.5)         | 1 (9.5)  | 1 (9.5)  | 262.36                                       | 10.64 | 1.64         |
|              | 2                                                           | 1        | 2 (10.0)        | 2 (10.0) | 2 (10.0) | 253.47                                       | 11.12 | 1.58         |
|              | 3                                                           | 1        | 3 (10.5)        | 3 (10.5) | 3 (10.5) | 253.44                                       | 11.62 | 1.58         |
|              | 4                                                           | 2 (10.0) | 1               | 2        | 3        | 255.59                                       | 11.03 | 1.60         |
|              | 5                                                           | 2        | 2               | 3        | 1        | 208.06                                       | 11.37 | 1.30         |
|              | 6                                                           | 2        | 3               | 1        | 2        | 219.55                                       | 11.11 | 1.37         |
|              | 7                                                           | 3 (10.5) | 1               | 3        | 2        | 216.93                                       | 11.35 | 1.36         |
|              | 8                                                           | 3        | 2               | 1        | 3        | 265.80                                       | 10.88 | 1.66         |
|              | 9                                                           | 3        | 3               | 2        | 1        | 247.50                                       | 11.30 | 1.55         |
| mean         | $\bar{K}_{1j}$                                              | 1.60     | 1.53            | 1.56     | 1.50     | $\bar{K}=1.52$                               |       |              |
|              | $\bar{K}_{2j}$                                              | 1.42     | 1.51            | 1.58     | 1.44     |                                              |       |              |
|              | $\bar{K}_{3j}$                                              | 1.52     | 1.50            | 1.41     | 1.61     |                                              |       |              |
| range        | $\bar{R}_j$                                                 | 0.18     | 0.03            | 0.17     | 0.17     |                                              |       |              |
| optimization | A <sub>2</sub> D <sub>2</sub> C <sub>3</sub> B <sub>3</sub> |          | feasible scheme |          |          | A <sub>2</sub> D <sub>2</sub> C <sub>3</sub> |       |              |

|        |
|--------|
| scheme |
|--------|

Table S7 Output shaft maximum impact simulation data and range analysis table (Gear shift timing /F1→F2)

|                     | factor         | A                                                           | B        | C               | D        | maximum impact                               | time (s) |
|---------------------|----------------|-------------------------------------------------------------|----------|-----------------|----------|----------------------------------------------|----------|
|                     | column number  | 1                                                           | 2        | 3               | 4        |                                              |          |
| scheme              | 1              | 1 (9.5)                                                     | 1 (9.5)  | 1 (9.5)         | 1 (9.5)  | 15.73                                        | 10.66    |
|                     | 2              | 1                                                           | 2 (10.0) | 2 (10.0)        | 2 (10.0) | 13.85                                        | 11.13    |
|                     | 3              | 1                                                           | 3 (10.5) | 3 (10.5)        | 3 (10.5) | 16.03                                        | 11.63    |
|                     | 4              | 2 (10.0)                                                    | 1        | 2               | 3        | 7.56                                         | 11.04    |
|                     | 5              | 2                                                           | 2        | 3               | 1        | 16.03                                        | 11.38    |
|                     | 6              | 2                                                           | 3        | 1               | 2        | 11.05                                        | 11.12    |
|                     | 7              | 3 (10.5)                                                    | 1        | 3               | 2        | 10.66                                        | 11.37    |
|                     | 8              | 3                                                           | 2        | 1               | 3        | 8.16                                         | 10.89    |
|                     | 9              | 3                                                           | 3        | 2               | 1        | 10.11                                        | 11.31    |
| mean                | $\bar{K}_{1j}$ | 15.20                                                       | 11.32    | 11.65           | 13.96    | $\bar{K}=12.13$                              |          |
|                     | $\bar{K}_{2j}$ | 11.55                                                       | 12.68    | 10.51           | 11.85    |                                              |          |
|                     | $\bar{K}_{3j}$ | 9.64                                                        | 12.40    | 14.24           | 10.58    |                                              |          |
| range               | $\bar{R}_j$    | 5.56                                                        | 1.36     | 3.73            | 3.38     |                                              |          |
| optimization scheme |                | A <sub>3</sub> C <sub>2</sub> D <sub>3</sub> B <sub>1</sub> |          | feasible scheme |          | A <sub>3</sub> C <sub>2</sub> D <sub>3</sub> |          |

Table S8 Shift time simulation data and range analysis table (Gear shift timing /F1→F2)

|                     | factor         | A                                                           | B        | C               | D        | timing of gear shift (s)                     | time (s) |
|---------------------|----------------|-------------------------------------------------------------|----------|-----------------|----------|----------------------------------------------|----------|
|                     | column number  | 1                                                           | 2        | 3               | 4        |                                              |          |
| scheme              | 1              | 1 (9.5)                                                     | 1 (9.5)  | 1 (9.5)         | 1 (9.5)  | 1.97                                         | 11.47    |
|                     | 2              | 1                                                           | 2 (10.0) | 2 (10.0)        | 2 (10.0) | 2.36                                         | 11.86    |
|                     | 3              | 1                                                           | 3 (10.5) | 3 (10.5)        | 3 (10.5) | 2.86                                         | 12.36    |
|                     | 4              | 2 (10.0)                                                    | 1        | 2               | 3        | 2.76                                         | 12.26    |
|                     | 5              | 2                                                           | 2        | 3               | 1        | 2.30                                         | 11.80    |
|                     | 6              | 2                                                           | 3        | 1               | 2        | 2.75                                         | 12.25    |
|                     | 7              | 3 (10.5)                                                    | 1        | 3               | 2        | 2.62                                         | 12.12    |
|                     | 8              | 3                                                           | 2        | 1               | 3        | 2.94                                         | 12.44    |
|                     | 9              | 3                                                           | 3        | 2               | 1        | 2.87                                         | 12.37    |
| mean                | $\bar{K}_{1j}$ | 2.40                                                        | 2.45     | 2.55            | 2.38     | $\bar{K}=2.60$                               |          |
|                     | $\bar{K}_{2j}$ | 2.60                                                        | 2.53     | 2.66            | 2.58     |                                              |          |
|                     | $\bar{K}_{3j}$ | 2.81                                                        | 2.83     | 2.59            | 2.85     |                                              |          |
| range               | $\bar{R}_j$    | 0.41                                                        | 0.38     | 0.11            | 0.47     |                                              |          |
| optimization scheme |                | D <sub>1</sub> A <sub>1</sub> B <sub>1</sub> C <sub>1</sub> |          | feasible scheme |          | D <sub>1</sub> A <sub>1</sub> B <sub>1</sub> |          |

## Supplementary III Simulation data and range analysis table (Gear shift timing /F2→F3)

Table S9 Output shaft speed drop simulation data and range analysis table (Gear shift timing /F2→F3)

|                     | factor                                                      | A        | B               | C        | D        | minimum speed                 | time  | speed drop |
|---------------------|-------------------------------------------------------------|----------|-----------------|----------|----------|-------------------------------|-------|------------|
|                     | column number                                               | 1        | 2               | 3        | 4        | (r/min)                       | (s)   |            |
| scheme              | 1                                                           | 1 (9.5)  | 1 (9.5)         | 1 (9.5)  | 1 (9.5)  | 411.18                        | 20.14 | 1874.53    |
|                     | 2                                                           | 1        | 2 (10.0)        | 2 (10.0) | 2 (10.0) | 410.81                        | 20.64 | 1874.90    |
|                     | 3                                                           | 1        | 3 (10.5)        | 3 (10.5) | 3 (10.5) | 383.02                        | 21.14 | 1902.69    |
|                     | 4                                                           | 2 (10.0) | 1               | 2        | 3        | 526.61                        | 20.42 | 1759.10    |
|                     | 5                                                           | 2        | 2               | 3        | 1        | 380.96                        | 20.29 | 1904.75    |
|                     | 6                                                           | 2        | 3               | 1        | 2        | 427.86                        | 20.71 | 1857.85    |
|                     | 7                                                           | 3 (10.5) | 1               | 3        | 2        | 379.72                        | 20.48 | 1905.99    |
|                     | 8                                                           | 3        | 2               | 1        | 3        | 531.08                        | 20.41 | 1754.63    |
|                     | 9                                                           | 3        | 3               | 2        | 1        | 379.87                        | 20.10 | 1905.84    |
| mean                | $\bar{K}_{1j}$                                              | 1884.04  | 1846.54         | 1829.00  | 1895.04  | $\bar{K}=1860.03$             |       |            |
|                     | $\bar{K}_{2j}$                                              | 1840.57  | 1844.76         | 1846.61  | 1879.58  |                               |       |            |
|                     | $\bar{K}_{3j}$                                              | 1855.49  | 1888.79         | 1904.48  | 1805.47  |                               |       |            |
| range               | $\bar{R}_j$                                                 | 43.47    | 44.03           | 75.48    | 89.57    |                               |       |            |
| optimization scheme | D <sub>3</sub> C <sub>1</sub> B <sub>2</sub> A <sub>2</sub> |          | feasible scheme |          |          | D <sub>3</sub> C <sub>1</sub> |       |            |

Note: When the input speed is 1600(r/min), the stable rotating speed of mechanical gear is 2285.71(r/min).

Table S10 Output shaft acceleration torque ratio simulation data and range analysis table (Gear shift timing /F2→F3)

|                     | factor         | A        | B               | C        | D        | acceleration   | time  | dynamic load |
|---------------------|----------------|----------|-----------------|----------|----------|----------------|-------|--------------|
|                     | column number  | 1        | 2               | 3        | 4        | torque (Nm)    | (s)   | coefficient  |
| scheme              | 1              | 1 (9.5)  | 1 (9.5)         | 1 (9.5)  | 1 (9.5)  | 331.50         | 21.71 | 2.07         |
|                     | 2              | 1        | 2 (10.0)        | 2 (10.0) | 2 (10.0) | 331.38         | 22.21 | 2.07         |
|                     | 3              | 1        | 3 (10.5)        | 3 (10.5) | 3 (10.5) | 331.54         | 22.74 | 2.07         |
|                     | 4              | 2 (10.0) | 1               | 2        | 3        | 330.06         | 21.90 | 2.06         |
|                     | 5              | 2        | 2               | 3        | 1        | 330.94         | 22.54 | 2.07         |
|                     | 6              | 2        | 3               | 1        | 2        | 331.99         | 22.43 | 2.07         |
|                     | 7              | 3 (10.5) | 1               | 3        | 2        | 330.37         | 22.45 | 2.06         |
|                     | 8              | 3        | 2               | 1        | 3        | 331.82         | 21.94 | 2.07         |
|                     | 9              | 3        | 3               | 2        | 1        | 331.66         | 22.56 | 2.07         |
| mean                | $\bar{K}_{1j}$ | 2.07     | 2.06            | 2.07     | 2.07     | $\bar{K}=2.07$ |       |              |
|                     | $\bar{K}_{2j}$ | 2.07     | 2.07            | 2.07     | 2.07     |                |       |              |
|                     | $\bar{K}_{3j}$ | 2.07     | 2.07            | 2.07     | 2.07     |                |       |              |
| range               | $\bar{R}_j$    | 0        | 0.01            | 0        | 0        |                |       |              |
| optimization scheme | -              |          | feasible scheme |          |          | -              |       |              |

Table S11 Output shaft maximum impact simulation data and range analysis table (Gear shift timing /F2→F3)

|                     | factor         | A                                                           | B        | C               | D        | maximum impact                | time (s) |
|---------------------|----------------|-------------------------------------------------------------|----------|-----------------|----------|-------------------------------|----------|
|                     | column number  | 1                                                           | 2        | 3               | 4        |                               |          |
| scheme              | 1              | 1 (9.5)                                                     | 1 (9.5)  | 1 (9.5)         | 1 (9.5)  | 6.97                          | 22.52    |
|                     | 2              | 1                                                           | 2 (10.0) | 2 (10.0)        | 2 (10.0) | 6.66                          | 23.03    |
|                     | 3              | 1                                                           | 3 (10.5) | 3 (10.5)        | 3 (10.5) | 7.37                          | 23.55    |
|                     | 4              | 2 (10.0)                                                    | 1        | 2               | 3        | 7.43                          | 22.69    |
|                     | 5              | 2                                                           | 2        | 3               | 1        | 6.36                          | 23.35    |
|                     | 6              | 2                                                           | 3        | 1               | 2        | 7.14                          | 23.19    |
|                     | 7              | 3 (10.5)                                                    | 1        | 3               | 2        | 7.27                          | 23.24    |
|                     | 8              | 3                                                           | 2        | 1               | 3        | 7.23                          | 22.70    |
|                     | 9              | 3                                                           | 3        | 2               | 1        | 7.40                          | 23.36    |
| mean                | $\bar{K}_{1j}$ | 7.00                                                        | 7.22     | 7.11            | 6.91     | $\bar{K}=7.09$                |          |
|                     | $\bar{K}_{2j}$ | 6.98                                                        | 6.75     | 7.16            | 7.02     |                               |          |
|                     | $\bar{K}_{3j}$ | 7.30                                                        | 7.30     | 7.00            | 7.34     |                               |          |
| range               | $\bar{R}_j$    | 0.32                                                        | 0.55     | 0.16            | 0.43     |                               |          |
| optimization scheme |                | B <sub>2</sub> D <sub>1</sub> A <sub>2</sub> C <sub>3</sub> |          | feasible scheme |          | B <sub>2</sub> D <sub>1</sub> |          |

Table S12 Shift time simulation data and range analysis table (Gear shift timing /F2→F3)

|                     | factor         | A                                                           | B        | C               | D        | timing of gear shift (s)      | time (s) |
|---------------------|----------------|-------------------------------------------------------------|----------|-----------------|----------|-------------------------------|----------|
|                     | column number  | 1                                                           | 2        | 3               | 4        |                               |          |
| scheme              | 1              | 1 (9.5)                                                     | 1 (9.5)  | 1 (9.5)         | 1 (9.5)  | 2.97                          | 22.47    |
|                     | 2              | 1                                                           | 2 (10.0) | 2 (10.0)        | 2 (10.0) | 3.47                          | 22.97    |
|                     | 3              | 1                                                           | 3 (10.5) | 3 (10.5)        | 3 (10.5) | 4.01                          | 23.51    |
|                     | 4              | 2 (10.0)                                                    | 1        | 2               | 3        | 3.14                          | 22.64    |
|                     | 5              | 2                                                           | 2        | 3               | 1        | 3.79                          | 23.29    |
|                     | 6              | 2                                                           | 3        | 1               | 2        | 3.64                          | 23.14    |
|                     | 7              | 3 (10.5)                                                    | 1        | 3               | 2        | 3.69                          | 23.19    |
|                     | 8              | 3                                                           | 2        | 1               | 3        | 3.15                          | 22.65    |
|                     | 9              | 3                                                           | 3        | 2               | 1        | 3.81                          | 23.31    |
| mean                | $\bar{K}_{1j}$ | 3.47                                                        | 3.27     | 3.25            | 3.52     | $\bar{K}=3.52$                |          |
|                     | $\bar{K}_{2j}$ | 3.52                                                        | 3.47     | 3.47            | 3.60     |                               |          |
|                     | $\bar{K}_{3j}$ | 3.55                                                        | 3.82     | 3.83            | 3.43     |                               |          |
| range               | $\bar{R}_j$    | 0.08                                                        | 0.55     | 0.58            | 0.17     |                               |          |
| optimization scheme |                | C <sub>1</sub> B <sub>1</sub> D <sub>3</sub> A <sub>1</sub> |          | feasible scheme |          | C <sub>1</sub> B <sub>1</sub> |          |

## Supplementary IV Test data and analysis of variance table (Gear shift timing /F1→F2)

Table S13 Output shaft speed drop test data and range analysis table (Gear shift timing /F1→F2)

| factor            | A        | B       | C       | D       | test result $Y_{ij}$ |                         |                      |                     |                    |           |  |  |  |  |
|-------------------|----------|---------|---------|---------|----------------------|-------------------------|----------------------|---------------------|--------------------|-----------|--|--|--|--|
| column number     | 1        | 2       | 3       | 4       | 1                    | 2                       | 3                    | 4                   | $X=$               | $Z=$      |  |  |  |  |
| test value        | 1        | 1       | 1       | 1       | 287.86               | 301.21                  | 366.86               | 317.18              | 1273.11            | 408780.26 |  |  |  |  |
|                   | 2        | 1       | 2       | 2       | 325.18               | 260.49                  | 320.67               | 275.17              | 1181.51            | 352144.85 |  |  |  |  |
|                   | 3        | 1       | 3       | 3       | 256.05               | 337.28                  | 335.99               | 247.48              | 1176.80            | 353455.03 |  |  |  |  |
|                   | 4        | 2       | 1       | 2       | 378.95               | 362.95                  | 323.04               | 308.46              | 1373.40            | 474838.22 |  |  |  |  |
|                   | 5        | 2       | 2       | 3       | 221.19               | 232.16                  | 231.27               | 221.10              | 905.72             | 205194.30 |  |  |  |  |
|                   | 6        | 2       | 3       | 1       | 361.17               | 341.77                  | 420.60               | 360.97              | 1484.51            | 554454.20 |  |  |  |  |
|                   | 7        | 3       | 1       | 3       | 359.70               | 281.91                  | 343.31               | 359.55              | 1344.47            | 455995.30 |  |  |  |  |
|                   | 8        | 3       | 2       | 1       | 344.94               | 326.45                  | 363.28               | 383.23              | 1417.90            | 504390.80 |  |  |  |  |
|                   | 9        | 3       | 3       | 2       | 313.22               | 365.84                  | 312.29               | 368.94              | 1360.29            | 465587.44 |  |  |  |  |
| statistical value | $K_{1j}$ | 3631.42 | 3990.98 | 4175.52 | 3539.12              | $\bar{Y}=$<br>319.94    | $O=$<br>132657643.64 | $P=$<br>14980388.29 | $Q=$<br>3774840.40 |           |  |  |  |  |
|                   | $K_{2j}$ | 3763.63 | 3505.13 | 3915.20 | 4010.49              |                         |                      |                     |                    |           |  |  |  |  |
|                   | $K_{3j}$ | 4122.66 | 4021.60 | 3426.99 | 3968.10              |                         |                      |                     |                    |           |  |  |  |  |
|                   | $R_j$    | 491.24  | 516.47  | 748.53  | 471.37               | $C_3B_2A_1D_1$          |                      |                     |                    |           |  |  |  |  |
|                   | $S$      | 10769.4 | 13992.5 | 24067.0 | 11333.6              | $S_C > S_B > S_D > S_A$ |                      |                     |                    |           |  |  |  |  |

Table S14 Output shaft speed drop test data and variance analysis table (Gear shift timing /F1→F2)

| source |   | $S$      | $f$ | $F$   | $P$    | conclusion |
|--------|---|----------|-----|-------|--------|------------|
| factor | A | 10769.41 | 2   | 4.89  | < 0.05 | ※ ※        |
|        | B | 13992.47 | 2   | 6.35  | < 0.01 | ※ ※ ※      |
|        | C | 24067.02 | 2   | 10.92 | < 0.01 | ※ ※ ※ ※    |
|        | D | 11333.62 | 2   | 5.14  | < 0.05 | ※ ※        |
| error  | e | 29743.33 | 27  |       |        |            |

Table S15 Output shaft acceleration torque ratio test data and range analysis table (Gear shift timing /F1→F2)

| factor               | A        | B     | C     | D     | test result $Y_{ij}$ |                         |         |        |             |             |
|----------------------|----------|-------|-------|-------|----------------------|-------------------------|---------|--------|-------------|-------------|
| column number        | 1        | 2     | 3     | 4     | 1                    | 2                       | 3       | 4      | $\bar{X} =$ | $\bar{Z} =$ |
| test<br>value        | 1        | 1     | 1     | 1     | 1.57                 | 1.80                    | 1.63    | 1.71   | 6.71        | 11.29       |
|                      | 2        | 1     | 2     | 2     | 1.67                 | 1.50                    | 1.65    | 1.73   | 6.55        | 10.75       |
|                      | 3        | 1     | 3     | 3     | 1.48                 | 1.74                    | 1.73    | 1.49   | 6.44        | 10.43       |
|                      | 4        | 2     | 1     | 2     | 1.74                 | 1.68                    | 1.51    | 1.59   | 6.52        | 10.66       |
|                      | 5        | 2     | 2     | 3     | 1.36                 | 1.43                    | 1.42    | 1.36   | 5.57        | 7.76        |
|                      | 6        | 2     | 3     | 1     | 1.23                 | 1.44                    | 1.43    | 1.37   | 5.47        | 7.51        |
|                      | 7        | 3     | 1     | 3     | 1.29                 | 1.36                    | 1.49    | 1.42   | 5.56        | 7.75        |
|                      | 8        | 3     | 2     | 1     | 1.66                 | 1.74                    | 1.57    | 1.66   | 6.63        | 11.00       |
|                      | 9        | 3     | 3     | 2     | 1.31                 | 1.62                    | 1.70    | 1.63   | 6.26        | 9.89        |
| statistical<br>value | $K_{1j}$ | 19.70 | 18.79 | 18.81 | 18.54                | $\bar{Y} =$             | $O =$   | $P =$  | $Q =$       |             |
|                      | $K_{2j}$ | 17.56 | 18.75 | 19.33 | 17.58                |                         |         |        |             |             |
|                      | $K_{3j}$ | 18.45 | 18.17 | 17.57 | 19.59                | 1.55                    | 3103.60 | 346.91 | 87.04       |             |
|                      | $R_j$    | 2.14  | 0.62  | 1.76  | 2.01                 | $A_2D_2C_3B_3$          |         |        |             |             |
|                      | $S$      | 0.193 | 0.020 | 0.136 | 0.168                | $S_A > S_D > S_C > S_B$ |         |        |             |             |

Table S16 Output shaft acceleration torque ratio test data and analysis of variance table (Gear shift timing /F1→F2)

| source |   | $S$   | $f$ | $F$   | $P$    | conclusion |
|--------|---|-------|-----|-------|--------|------------|
| factor | A | 0.193 | 2   | 8.365 | < 0.05 | ※※※        |
|        | B | 0.020 | 2   | 0.871 |        |            |
|        | C | 0.136 | 2   | 5.917 | < 0.01 | ※※※        |
|        | D | 0.168 | 2   | 7.315 | < 0.05 | ※※※        |
| error  |   | e     | 27  |       |        |            |



Table S17 Output Shaft Maximum Impact Test Data and Range Analysis Table (Gear shift timing /F1→F2)

| factor               | A        | B      | C      | D      | test result $Y_{ij}$ |                         |       |           |          |         |
|----------------------|----------|--------|--------|--------|----------------------|-------------------------|-------|-----------|----------|---------|
| column number        | 1        | 2      | 3      | 4      | 1                    | 2                       | 3     | 4         | $X=$     | $Z=$    |
| test<br>value        | 1        | 1      | 1      | 1      | 15.07                | 12.71                   | 12.64 | 13.30     | 53.72    | 725.31  |
|                      | 2        | 1      | 2      | 2      | 16.05                | 11.74                   | 11.13 | 11.16     | 50.08    | 643.85  |
|                      | 3        | 1      | 3      | 3      | 12.88                | 16.00                   | 12.89 | 12.92     | 54.69    | 754.97  |
|                      | 4        | 2      | 1      | 2      | 8.24                 | 6.41                    | 6.08  | 6.09      | 26.82    | 183.04  |
|                      | 5        | 2      | 2      | 3      | 13.57                | 17.61                   | 15.94 | 12.93     | 60.05    | 915.53  |
|                      | 6        | 2      | 3      | 1      | 8.92                 | 8.94                    | 11.54 | 11.01     | 40.41    | 413.88  |
|                      | 7        | 3      | 1      | 3      | 11.16                | 11.72                   | 9.54  | 9.03      | 41.45    | 434.46  |
|                      | 8        | 3      | 2      | 1      | 8.14                 | 7.75                    | 8.53  | 6.59      | 31.01    | 242.51  |
|                      | 9        | 3      | 3      | 2      | 8.17                 | 8.12                    | 11.07 | 9.62      | 36.98    | 347.77  |
| statistical<br>value | $K_{1j}$ | 158.49 | 121.99 | 125.14 | 150.75               | $\bar{Y}=$              |       | $O=$      | $P=$     | $Q=$    |
|                      | $K_{2j}$ | 109.44 | 141.14 | 113.88 | 131.94               | 10.98                   |       | 156190.90 | 18390.37 | 4661.32 |
|                      | $K_{3j}$ | 109.44 | 132.08 | 156.19 | 112.52               |                         |       |           |          |         |
|                      | $R_j$    | 49.05  | 19.15  | 42.31  | 38.23                | $A_3C_2D_3B_1$          |       |           |          |         |
|                      | $S$      | 102.73 | 15.29  | 80.03  | 60.90                | $S_A > S_C > S_D > S_B$ |       |           |          |         |

Table S18 Output Shaft Maximum Impact Test Data and Analysis of Variance Table (Gear shift timing /F1→F2)

| source |   | $S$    | $f$ | $F$   | $P$    | conclusion |
|--------|---|--------|-----|-------|--------|------------|
| factor | A | 102.73 | 2   | 21.76 | < 0.01 | ※※※        |
|        | B | 15.29  | 2   | 3.24  | < 0.10 | ※          |
|        | C | 80.03  | 2   | 16.95 | < 0.01 | ※※※        |
|        | D | 60.90  | 2   | 12.90 | < 0.01 | ※※※        |
| error  | e | 63.73  | 27  |       |        |            |

Table S19 Shift Time Test Data and Range Analysis Table (Gear shift timing /F1→F2)

| factor               | A        | B     | C     | D     | test result $Y_{ij}$ |                         |      |         |             |        |
|----------------------|----------|-------|-------|-------|----------------------|-------------------------|------|---------|-------------|--------|
| column number        | 1        | 2     | 3     | 4     | 1                    | 2                       | 3    | 4       | $\bar{X} =$ | $Z =$  |
| test<br>value        | 1        | 1     | 1     | 1     | 1.89                 | 2.16                    | 1.96 | 2.06    | 8.07        | 16.32  |
|                      | 2        | 1     | 2     | 2     | 2.50                 | 2.24                    | 2.46 | 2.59    | 9.79        | 24.03  |
|                      | 3        | 1     | 3     | 3     | 2.67                 | 2.57                    | 3.13 | 2.71    | 11.08       | 30.87  |
|                      | 4        | 2     | 1     | 2     | 2.73                 | 2.89                    | 2.61 | 2.75    | 10.98       | 30.18  |
|                      | 5        | 2     | 2     | 3     | 2.64                 | 2.53                    | 2.29 | 2.18    | 9.64        | 23.37  |
|                      | 6        | 2     | 3     | 1     | 3.02                 | 2.88                    | 2.60 | 2.22    | 10.72       | 29.10  |
|                      | 7        | 3     | 1     | 3     | 2.48                 | 2.36                    | 2.87 | 2.74    | 10.45       | 27.46  |
|                      | 8        | 3     | 2     | 1     | 3.23                 | 3.08                    | 2.37 | 2.37    | 11.05       | 31.15  |
|                      | 9        | 3     | 3     | 2     | 2.32                 | 2.31                    | 3.14 | 2.73    | 10.50       | 28.03  |
| statistical<br>value | $K_{1j}$ | 28.94 | 29.50 | 29.84 | 28.21                | $\bar{Y} =$             |      | $O =$   | $P =$       | $Q =$  |
|                      | $K_{2j}$ | 31.34 | 30.48 | 31.27 | 30.96                | 2.56                    |      | 8515.60 | 953.70      | 240.52 |
|                      | $K_{3j}$ | 32.00 | 32.30 | 31.17 | 33.11                |                         |      |         |             |        |
|                      | $R_j$    | 3.06  | 2.80  | 1.43  | 4.90                 | $D_1 A_1 B_1 C_1$       |      |         |             |        |
|                      | $S$      | 0.432 | 0.336 | 0.106 | 1.005                | $S_D > S_A > S_B > S_C$ |      |         |             |        |

Table S20 Shift Time Test Data and Analysis of Variance Table (Gear shift timing /F1→F2)

| source |   | $S$   | $f$ | $F$  | $P$    | conclusion |
|--------|---|-------|-----|------|--------|------------|
| factor | A | 0.432 | 2   | 2.78 | < 0.10 | *          |
|        | B | 0.336 | 2   | 2.16 |        |            |
|        | C | 0.106 | 2   | 0.68 |        |            |
|        | D | 1.005 | 2   | 6.47 | < 0.01 | ***        |
| error  | e | 2.099 | 27  |      |        |            |

## Supplementary V Test data and analysis of variance table (Gear shift timing /F2→F3)

| Table S21 Output Shaft Speed Drop Test Data and Range Analysis Table (Gear shift timing /F2→F3) |          |       |       |       |        |                         |         |                        |         |                       |             |  |  |  |  |
|-------------------------------------------------------------------------------------------------|----------|-------|-------|-------|--------|-------------------------|---------|------------------------|---------|-----------------------|-------------|--|--|--|--|
| factor                                                                                          |          | A     | B     | C     | D      | test result $Y_{ij}$    |         |                        |         | $\bar{X} =$           | $\bar{Z} =$ |  |  |  |  |
| column number                                                                                   |          | 1     | 2     | 3     | 4      | 1                       | 2       | 3                      | 4       |                       |             |  |  |  |  |
| test<br>value                                                                                   | 1        | 1     | 1     | 1     | 1      | 1608.53                 | 1870.59 | 1862.53                | 1772.37 | 7114.02               | 12696789.13 |  |  |  |  |
|                                                                                                 | 2        | 1     | 2     | 2     | 2      | 1984.77                 | 1964.90 | 1957.21                | 2054.52 | 7961.40               | 15851867.38 |  |  |  |  |
|                                                                                                 | 3        | 1     | 3     | 3     | 3      | 1967.00                 | 1937.51 | 1894.46                | 1799.75 | 7598.72               | 14451112.75 |  |  |  |  |
|                                                                                                 | 4        | 2     | 1     | 2     | 3      | 1917.95                 | 1844.42 | 1660.94                | 1752.24 | 7175.55               | 12909484.04 |  |  |  |  |
|                                                                                                 | 5        | 2     | 2     | 3     | 1      | 1993.89                 | 2092.75 | 1894.27                | 1993.13 | 7974.04               | 15916025.92 |  |  |  |  |
|                                                                                                 | 6        | 2     | 3     | 1     | 2      | 2038.25                 | 1762.91 | 1940.90                | 2037.32 | 7779.38               | 15180080.32 |  |  |  |  |
|                                                                                                 | 7        | 3     | 1     | 3     | 2      | 1805.35                 | 1904.27 | 2086.87                | 1804.40 | 7600.89               | 14496418.61 |  |  |  |  |
|                                                                                                 | 8        | 3     | 2     | 1     | 3      | 1750.07                 | 1841.13 | 1658.30                | 1749.37 | 6998.87               | 12262758.97 |  |  |  |  |
|                                                                                                 | 9        | 3     | 3     | 2     | 1      | 1806.16                 | 1797.97 | 1896.88                | 1813.22 | 7314.23               | 13380830.57 |  |  |  |  |
| statistical<br>value                                                                            | $K_{1j}$ | 22674 | 21890 | 21892 | 22402  | $\bar{Y} =$<br>1875.48  |         | $O =$<br>4558558792.41 |         | $P =$<br>507581971.63 |             |  |  |  |  |
|                                                                                                 | $K_{2j}$ | 22928 | 22934 | 22451 | 23342  |                         |         |                        |         |                       |             |  |  |  |  |
|                                                                                                 | $K_{3j}$ | 21914 | 22692 | 23174 | 21773  |                         |         |                        |         |                       |             |  |  |  |  |
|                                                                                                 | $R_j$    | 1014  | 1044  | 1282  | 1569   | $D_3A_1B_1C_3$          |         |                        |         |                       |             |  |  |  |  |
|                                                                                                 | $S$      | 46471 | 49755 | 68786 | 103849 | $S_D > S_C > S_B > S_A$ |         |                        |         |                       |             |  |  |  |  |

| Table S22 Output shaft deceleration amplitude test data and analysis of variance table (Gear shift timing /F2→F3) |   |        |        |      |        |            |
|-------------------------------------------------------------------------------------------------------------------|---|--------|--------|------|--------|------------|
| source                                                                                                            |   | $S$    | $f$    | $F$  | $P$    | conclusion |
| factor                                                                                                            | A | 46471  | 2      | 2.51 |        |            |
|                                                                                                                   | B | 46471  | 2      | 2.69 | < 0.10 | ※          |
|                                                                                                                   | C | 68786  | 2      | 3.72 | < 0.05 | ※※         |
|                                                                                                                   | D | 103849 | 2      | 5.61 | < 0.01 | ※※※        |
| error                                                                                                             |   | e      | 249875 | 27   |        |            |

Table S23 Output shaft acceleration torque ratio test data and range analysis table (Gear shift timing /F2→F3)

| factor               | A        | B     | C     | D     | test result $Y_{ij}$ |                         |                 |      |                |                |
|----------------------|----------|-------|-------|-------|----------------------|-------------------------|-----------------|------|----------------|----------------|
| column number        | 1        | 2     | 3     | 4     | 1                    | 2                       | 3               | 4    | $X=$           | $Z=$           |
| test<br>value        | 1        | 1     | 1     | 1     | 1.98                 | 2.27                    | 2.06            | 2.16 | 8.47           | 17.98          |
|                      | 2        | 1     | 2     | 2     | 2.19                 | 1.96                    | 2.16            | 2.06 | 8.37           | 17.55          |
|                      | 3        | 1     | 3     | 3     | 1.93                 | 2.27                    | 2.06            | 1.96 | 8.22           | 16.96          |
|                      | 4        | 2     | 1     | 2     | 2.04                 | 2.16                    | 1.95            | 2.05 | 8.20           | 16.83          |
|                      | 5        | 2     | 2     | 3     | 2.17                 | 2.27                    | 2.06            | 2.05 | 8.67           | 18.81          |
|                      | 6        | 2     | 3     | 1     | 2.06                 | 1.96                    | 2.16            | 2.06 | 8.24           | 16.99          |
|                      | 7        | 3     | 1     | 3     | 1.95                 | 2.06                    | 2.26            | 2.06 | 8.22           | 16.96          |
|                      | 8        | 3     | 2     | 1     | 2.06                 | 2.17                    | 1.96            | 2.06 | 8.25           | 17.04          |
|                      | 9        | 3     | 3     | 2     | 2.17                 | 1.95                    | 2.06            | 1.97 | 8.15           | 16.64          |
| statistical<br>value | $K_{1j}$ | 25.06 | 24.89 | 24.96 | 25.29                | $\bar{Y}=$<br>2.08      | $O=$<br>5593.54 |      | $P=$<br>621.73 | $Q=$<br>155.76 |
|                      | $K_{2j}$ | 25.11 | 25.29 | 24.72 | 24.83                |                         |                 |      |                |                |
|                      | $K_{3j}$ | 24.62 | 24.61 | 25.11 | 24.67                |                         |                 |      |                |                |
|                      | $R_j$    | 0.49  | 0.68  | 0.39  | 0.62                 | $D_3A_3B_3C_2$          |                 |      |                |                |
|                      | $S$      | 0.012 | 0.019 | 0.006 | 0.017                | $S_B > S_D > S_A > S_C$ |                 |      |                |                |

Table S24 Output shaft acceleration torque ratio test data and analysis of variance table (Gear shift timing /F2→F3)

| source | $S$ | $f$   | $F$ | $P$   | conclusion |
|--------|-----|-------|-----|-------|------------|
| factor | A   | 0.012 | 2   | 0.493 |            |
|        | B   | 0.019 | 2   | 0.793 |            |
|        | C   | 0.006 | 2   | 0.263 |            |
|        | D   | 0.017 | 2   | 0.703 |            |
| error  | e   | 0.332 | 27  |       |            |

Table S25 Output Shaft Maximum Impact Test Data and Range Analysis Table (Gear shift timing /F2→F3)

| factor               | A        | B     | C     | D     | test result $Y_{ij}$ |                         |                  |                 |                 |        |  |  |  |
|----------------------|----------|-------|-------|-------|----------------------|-------------------------|------------------|-----------------|-----------------|--------|--|--|--|
| column number        | 1        | 2     | 3     | 4     | 1                    | 2                       | 3                | 4               | $X=$            | $Z=$   |  |  |  |
| test<br>value        | 1        | 1     | 1     | 1     | 6.68                 | 7.65                    | 6.93             | 7.29            | 28.55           | 204.31 |  |  |  |
|                      | 2        | 1     | 2     | 2     | 7.05                 | 6.31                    | 6.95             | 7.30            | 27.61           | 191.11 |  |  |  |
|                      | 3        | 1     | 3     | 3     | 6.88                 | 8.09                    | 8.06             | 7.71            | 30.74           | 237.19 |  |  |  |
|                      | 4        | 2     | 1     | 2     | 7.36                 | 6.30                    | 7.76             | 6.66            | 28.08           | 198.43 |  |  |  |
|                      | 5        | 2     | 2     | 3     | 5.39                 | 6.35                    | 6.33             | 6.66            | 24.73           | 153.80 |  |  |  |
|                      | 6        | 2     | 3     | 1     | 7.83                 | 8.20                    | 7.46             | 7.12            | 30.61           | 234.89 |  |  |  |
|                      | 7        | 3     | 1     | 3     | 7.61                 | 7.26                    | 7.96             | 6.88            | 29.71           | 221.32 |  |  |  |
|                      | 8        | 3     | 2     | 1     | 7.93                 | 7.59                    | 7.56             | 7.21            | 30.29           | 229.63 |  |  |  |
|                      | 9        | 3     | 3     | 2     | 7.75                 | 6.98                    | 7.37             | 7.04            | 29.14           | 212.66 |  |  |  |
| statistical<br>value | $K_{1j}$ | 86.90 | 86.34 | 89.45 | 82.42                | $\bar{Y}=$<br>7.21      | $O=$<br>67319.49 | $P=$<br>7508.70 | $Q=$<br>1883.35 |        |  |  |  |
|                      | $K_{2j}$ | 83.42 | 82.63 | 84.83 | 87.93                |                         |                  |                 |                 |        |  |  |  |
|                      | $K_{3j}$ | 89.14 | 90.49 | 85.18 | 89.11                |                         |                  |                 |                 |        |  |  |  |
|                      | $R_j$    | 5.72  | 7.86  | 4.62  | 6.69                 | $D_2A_1B_2C_2$          |                  |                 |                 |        |  |  |  |
|                      | $S$      | 1.385 | 2.577 | 1.103 | 2.125                | $S_B > S_D > S_A > S_C$ |                  |                 |                 |        |  |  |  |

Table S26 Output Shaft Maximum Impact Test Data and Analysis of Variance Table (Gear shift timing /F2→F3)

| source |   | $S$   | $f$ | $F$   | $P$    | conclusion |
|--------|---|-------|-----|-------|--------|------------|
| factor | A | 1.385 | 2   | 3.03  | < 0.10 | ※          |
|        | B | 2.577 | 2   | 5.63  | < 0.01 | ※※※        |
|        | C | 1.103 | 2   | 2.411 |        |            |
|        | D | 2.125 | 2   | 4.65  | < 0.05 | ※※         |
| error  | e | 6.174 | 27  |       |        |            |

Table S27 Shift Time Test Data and Range Analysis Table (Gear shift timing /F2→F3)

| factor               | A        | B     | C     | D     | test result $Y_{ij}$ |                         |                  |                 |                |       |  |  |  |  |
|----------------------|----------|-------|-------|-------|----------------------|-------------------------|------------------|-----------------|----------------|-------|--|--|--|--|
| column number        | 1        | 2     | 3     | 4     | 1                    | 2                       | 3                | 4               | $X=$           | $Z=$  |  |  |  |  |
| test<br>value        | 1        | 1     | 1     | 1     | 2.85                 | 3.26                    | 2.95             | 3.11            | 12.17          | 37.12 |  |  |  |  |
|                      | 2        | 1     | 2     | 2     | 3.67                 | 3.29                    | 3.62             | 3.80            | 14.38          | 51.84 |  |  |  |  |
|                      | 3        | 1     | 3     | 3     | 3.74                 | 4.00                    | 4.39             | 3.79            | 15.92          | 63.62 |  |  |  |  |
|                      | 4        | 2     | 1     | 2     | 3.11                 | 3.29                    | 2.96             | 3.13            | 12.49          | 39.05 |  |  |  |  |
|                      | 5        | 2     | 2     | 3     | 3.97                 | 4.16                    | 3.77             | 3.97            | 15.87          | 63.04 |  |  |  |  |
|                      | 6        | 2     | 3     | 1     | 3.99                 | 3.45                    | 3.80             | 3.99            | 15.23          | 58.18 |  |  |  |  |
|                      | 7        | 3     | 1     | 3     | 3.50                 | 3.69                    | 4.04             | 3.49            | 14.72          | 54.37 |  |  |  |  |
|                      | 8        | 3     | 2     | 1     | 3.14                 | 3.31                    | 2.98             | 3.14            | 12.57          | 39.56 |  |  |  |  |
|                      | 9        | 3     | 3     | 2     | 3.08                 | 3.06                    | 4.17             | 3.62            | 13.93          | 49.34 |  |  |  |  |
| statistical<br>value | $K_{1j}$ | 42.47 | 39.38 | 39.97 | 41.97                | $\bar{Y}=$<br>3.54      | $O=$<br>16200.20 | $P=$<br>1816.88 | $Q=$<br>456.13 |       |  |  |  |  |
|                      | $K_{2j}$ | 43.59 | 42.82 | 40.80 | 44.33                |                         |                  |                 |                |       |  |  |  |  |
|                      | $K_{3j}$ | 41.22 | 45.08 | 46.51 | 40.98                |                         |                  |                 |                |       |  |  |  |  |
|                      | $R_j$    | 2.37  | 5.70  | 6.54  | 3.35                 | $D_1A_1B_3C_3$          |                  |                 |                |       |  |  |  |  |
|                      | $S$      | 0.234 | 1.373 | 2.113 | 0.494                | $S_C > S_B > S_D > S_A$ |                  |                 |                |       |  |  |  |  |

Table S28 Shift Time Test Data and Analysis of Variance Table (Gear shift timing /F2→F3)

| source |   | $S$   | $f$ | $F$    | $P$    | conclusion |
|--------|---|-------|-----|--------|--------|------------|
| factor | A | 0.234 | 2   | 1.655  |        |            |
|        | B | 1.373 | 2   | 9.700  | < 0.01 | ※※※        |
|        | C | 2.113 | 2   | 14.927 | < 0.01 | ※※※        |
|        | D | 0.494 | 2   | 3.488  | < 0.05 | ※※         |
| error  | e | 1.911 | 27  |        |        |            |
